# Supplementary material for: Effects of an exclusive breastfeeding intervention for six months on growth patterns of 4–5 year old children in Uganda: the cluster-randomised PROMISE EBF trial
Source: PubMed Central journal article supplement (PMC4942943; doi:10.1186/s12889-016-3234-3), 2016-07-12

**Table S1:** Background characteristics of the populations of the 5 years follow-up and those lost-to-follow-up at 5-years visit.

| Visit                          | 5 years visit |         |              |         | Lost-to-follow-up at 5-years visit |         |              |         |
|--------------------------------|---------------|---------|--------------|---------|------------------------------------|---------|--------------|---------|
|                                | Control       |         | Intervention |         | Control                            |         | Intervention |         |
| Categorical data               | n             | %       | n            | %       | n                                  | %       | n            | %       |
| Eligible mother-infant pairs   | 221           |         | 242          |         | 148                                |         | 154          |         |
| Multipara (child has siblings) | 174           | 79      | 196          | 82      | 99                                 | 67      | 110          | 71      |
| Previous child death           | 56            | 32      | 73           | 37      | 24                                 | 16      | 36           | 23      |
| Female child                   | 110           | 50      | 119          | 49      | 71                                 | 48      | 75           | 49      |
| Mother married or cohabiting   | 209           | 95      | 224          | 93      | 129                                | 87      | 139          | 90      |
| Living in rural area           | 172           | 78      | 187          | 77      | 104                                | 70      | 103          | 67      |
| Electricity in house           | 37            | 17      | 30           | 13      | 33                                 | 22      | 23           | 15      |
| Continuous data                | median        | IQR     | median       | IQR     | median                             | IQR     | median       | IQR     |
| Maternal age                   | 25            | (21–31) | 26           | (21–30) | 23                                 | (20–28) | 24           | (20–28) |
| Maternal education             | 6             | (4–9)   | 6            | (4–7)   | 7                                  | (5–9)   | 6            | (4–8)   |
| Child age                      | 53            | (49–61) | 55           | (50–62) | unknown                            |         | unknown      |         |
| Maternal body mass index       | 22            | (21–24) | 22           | (20–24) | 22                                 | (20–23) | 21           | (20–23) |
| Socio-economic quintile        | 3             | (2–4)   | 3            | (2–4)   | 4                                  | (2–5)   | 3            | (2–4)   |

**Table S2:** Weight-for-length/height z-scores (WLZ) with number (n) of measurements and means in the intervention and control arm with 95% confidence intervals (CI). The differences in means are adjusted for cluster in addition to inverse-probability population weights.

| Visit    | Intervention |                        | Control |                       | Adjusted difference difference (95 %CI) |
|----------|--------------|------------------------|---------|-----------------------|-----------------------------------------|
|          | n            | mean (95 %CI)          | n       | mean (95 %CI)         |                                         |
| 3 weeks  | 315          | -0.19 (-0.35 to -0.03) | 286     | -0.01 (-0.21 to 0.19) | -0.18 (-0.43 to 0.07)                   |
| 6 weeks  | 343          | 0.14 (-0.01 to 0.30)   | 313     | 0.20 (0.04 to 0.36)   | -0.06 (-0.27 to 0.14)                   |
| 12 weeks | 366          | 0.09 (-0.08 to 0.26)   | 325     | 0.27 (0.12 to 0.42)   | -0.18 (-0.40 to 0.04)                   |
| 24 weeks | 363          | -0.09 (-0.24 to 0.06)  | 328     | 0.21 (0.05 to 0.38)   | -0.30 (-0.52 to -0.08)                  |
| 2 years  | 331          | -0.06 (-0.21 to 0.10)  | 312     | 0.10 (-0.18 to 0.37)  | -0.15 (-0.44 to 0.15)                   |

\* WLZ scores are not calculated by WHO Anthro+ for children above the age of 5 years (thus z-scores from the last visit are excluded from the presentation)

**Table S3:** Wasting (WLZ<-2) in the intervention and control arms with odds ratios (OR) with 95% confidence intervals (CI). The odds ratios are adjusted for cluster and with inverse-probability population weights.

| Visit   | Intervention |   | Control |   | OR (95% CI)     |
|---------|--------------|---|---------|---|-----------------|
|         | n            | % | n       | % |                 |
| 3 week  | 15           | 5 | 14      | 5 | 0.90 (0.42–1.9) |
| 6 week  | 12           | 4 | 8       | 3 | 1.4 (0.62–3.1)  |
| 12 week | 22           | 6 | 10      | 3 | 2.1 (1.0–4.3)   |
| 24 week | 26           | 8 | 10      | 3 | 2.5 (1.1–5.7)   |
| 2 years | 16           | 5 | 16      | 5 | 1.1 (0.51–2.5)  |

\* WLZ scores are not calculated by WHO Anthro+ for children above the age of 5 years (thus z-scores from the last visit are excluded from the presentation)

## 3 weeks

control HAZ

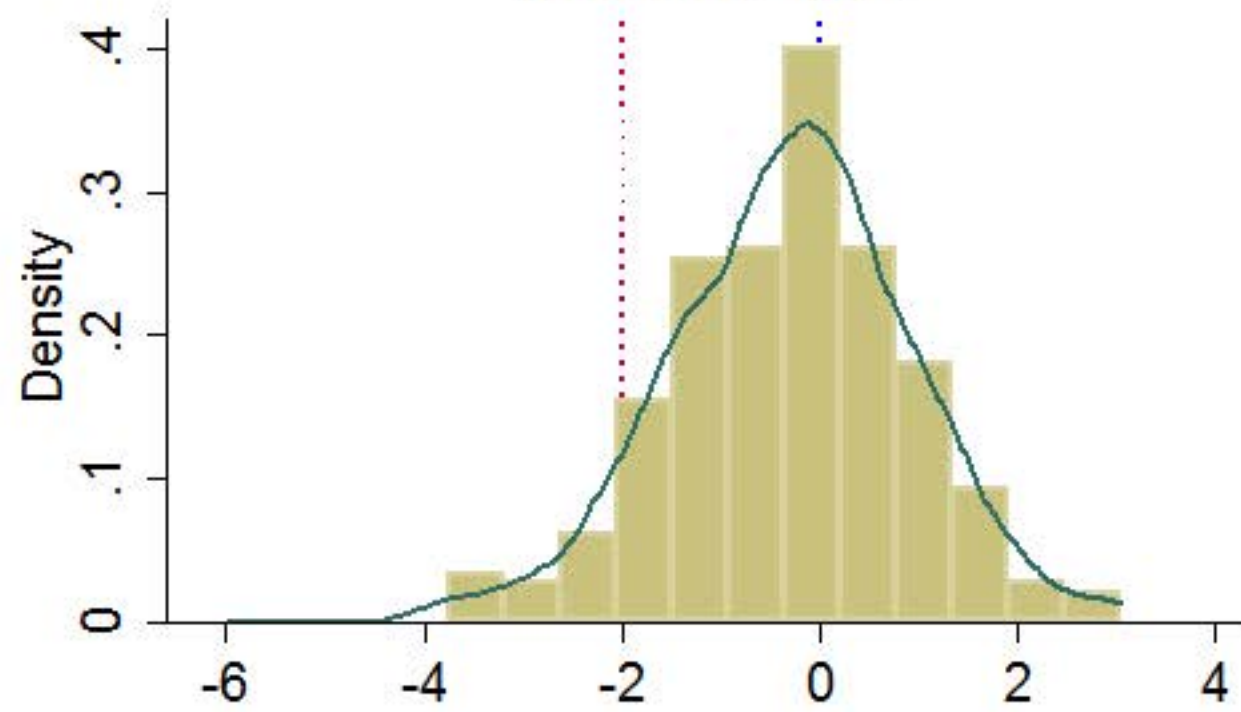

control WLZ

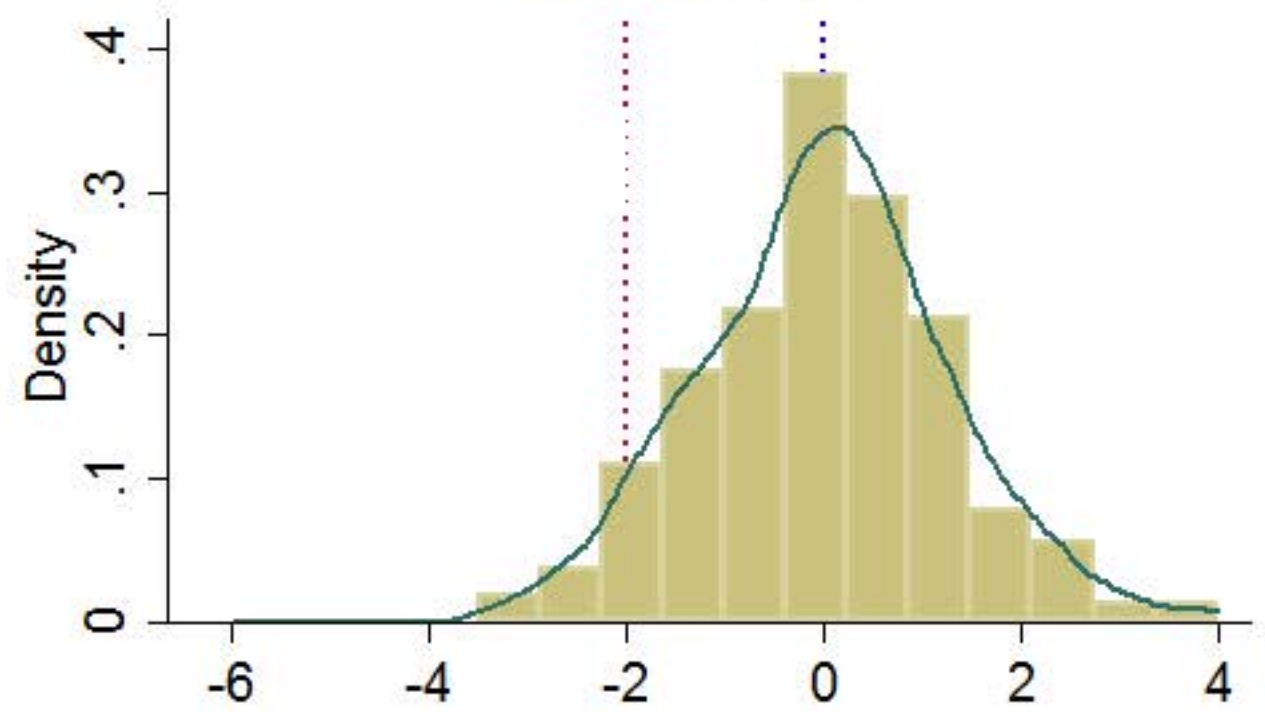

intervention HAZ

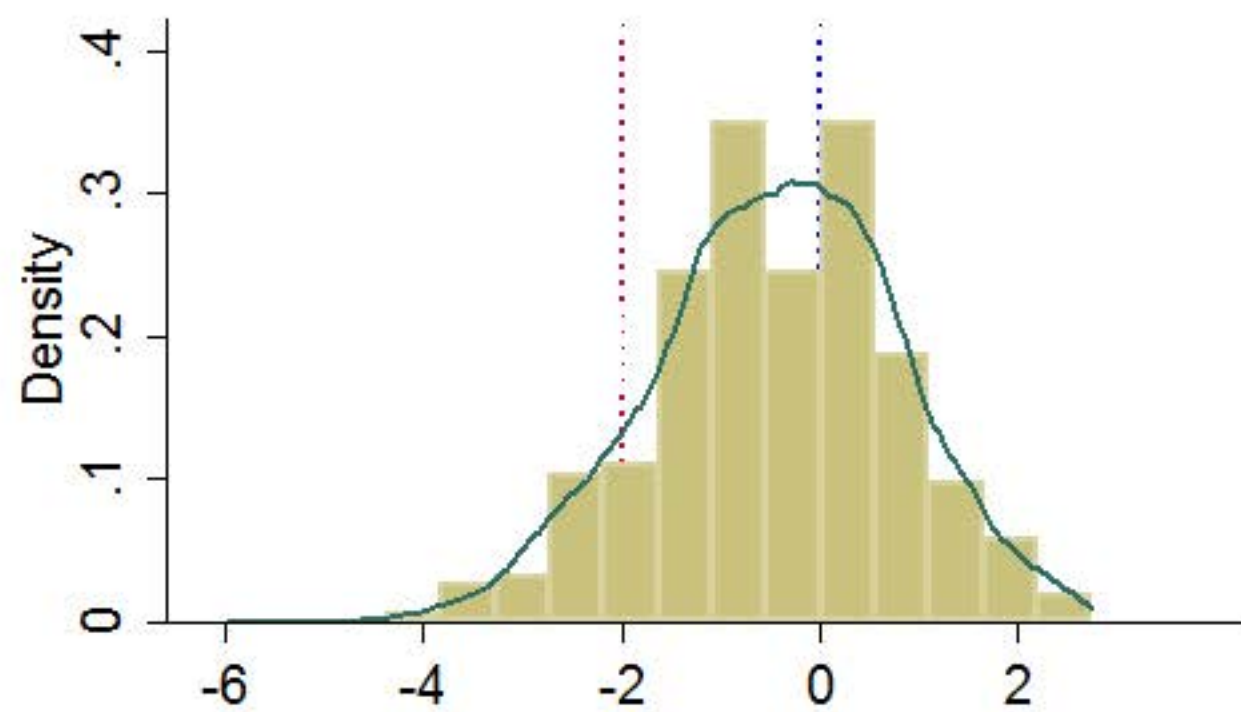

intervention WLZ

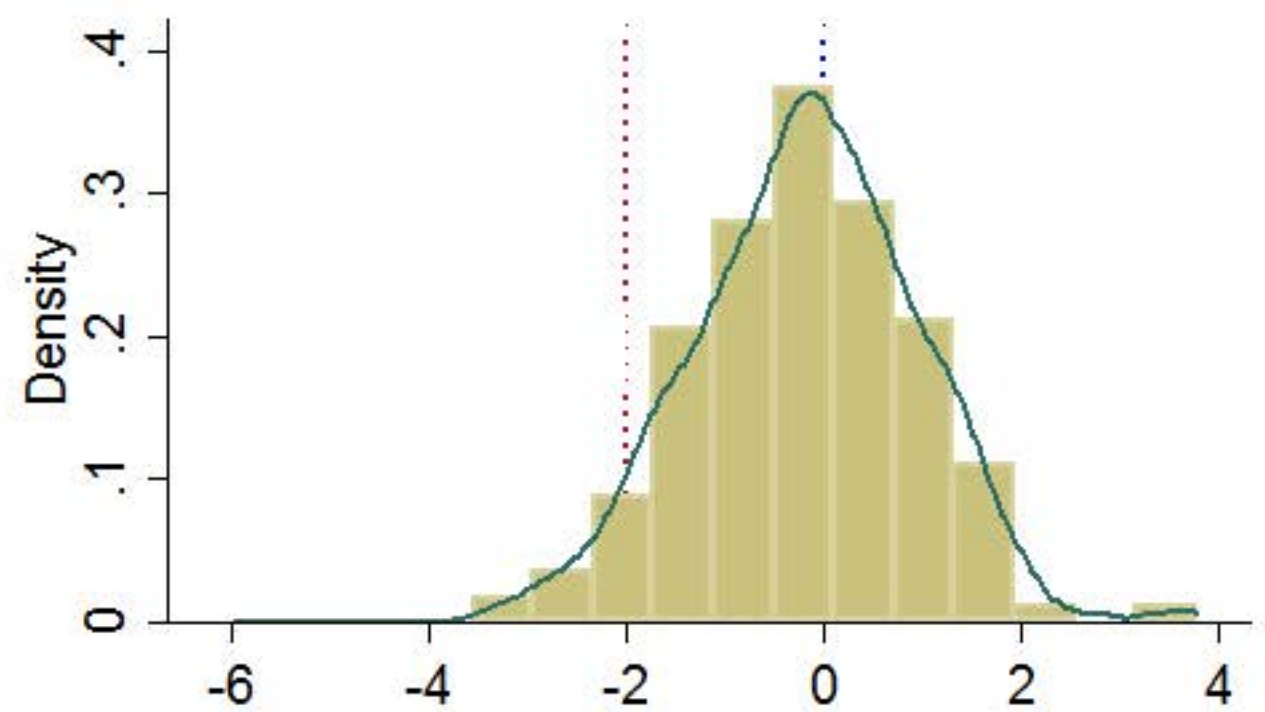

## 24 weeks

control HAZ

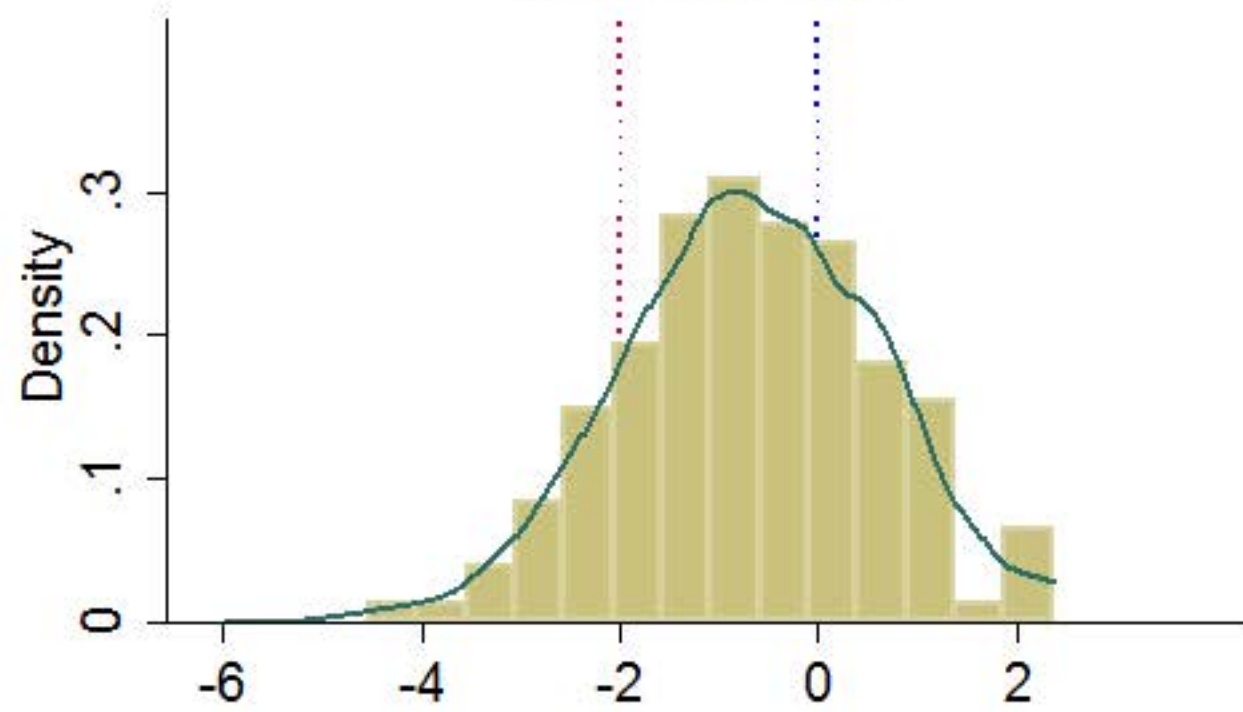

control WLZ

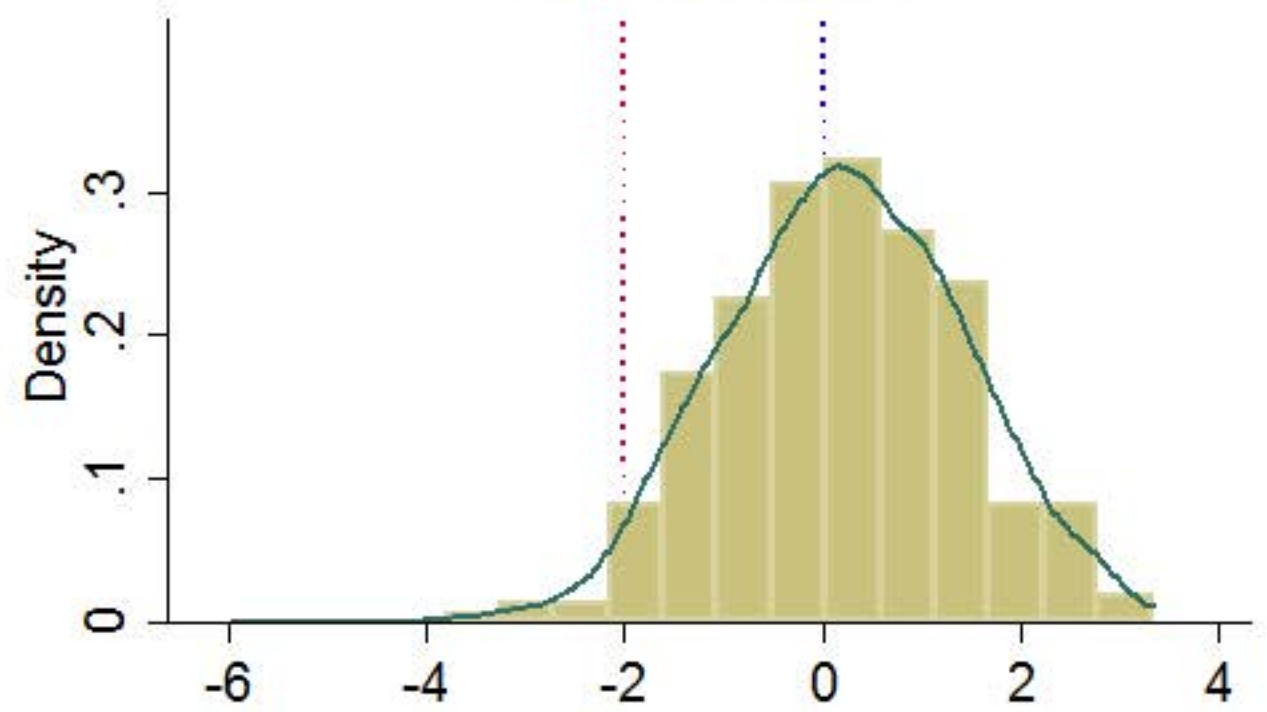

intervention HAZ

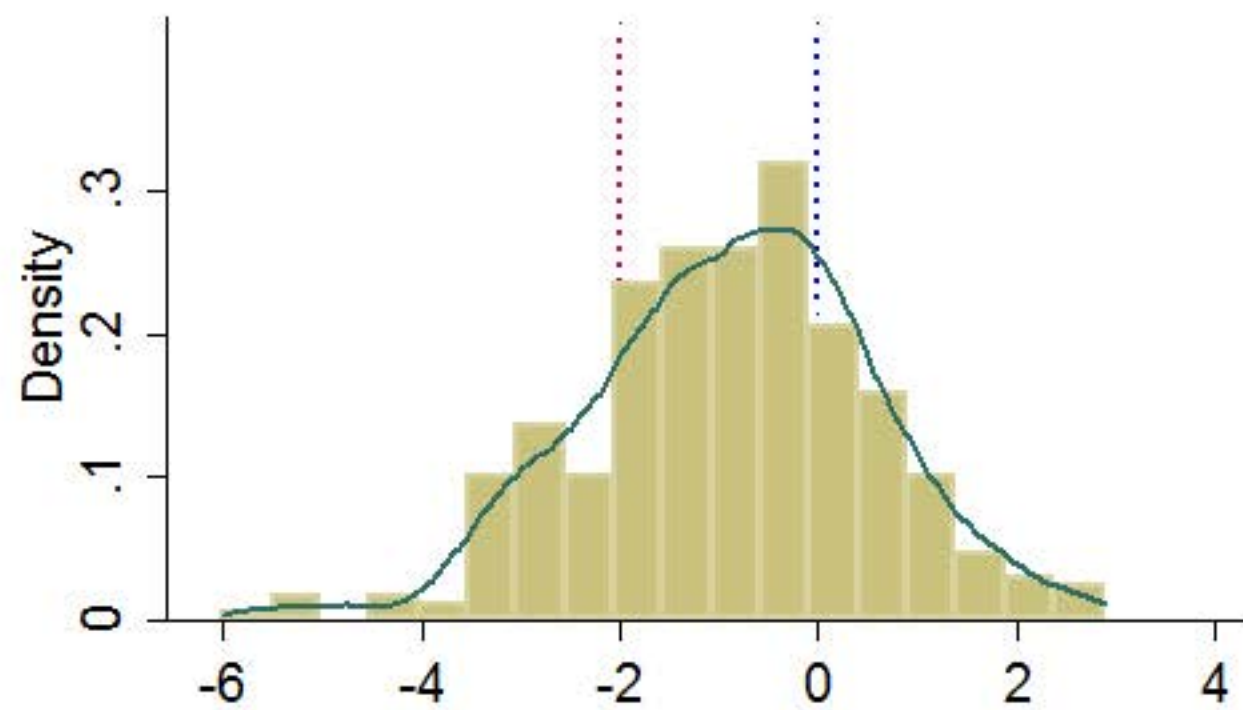

intervention WLZ

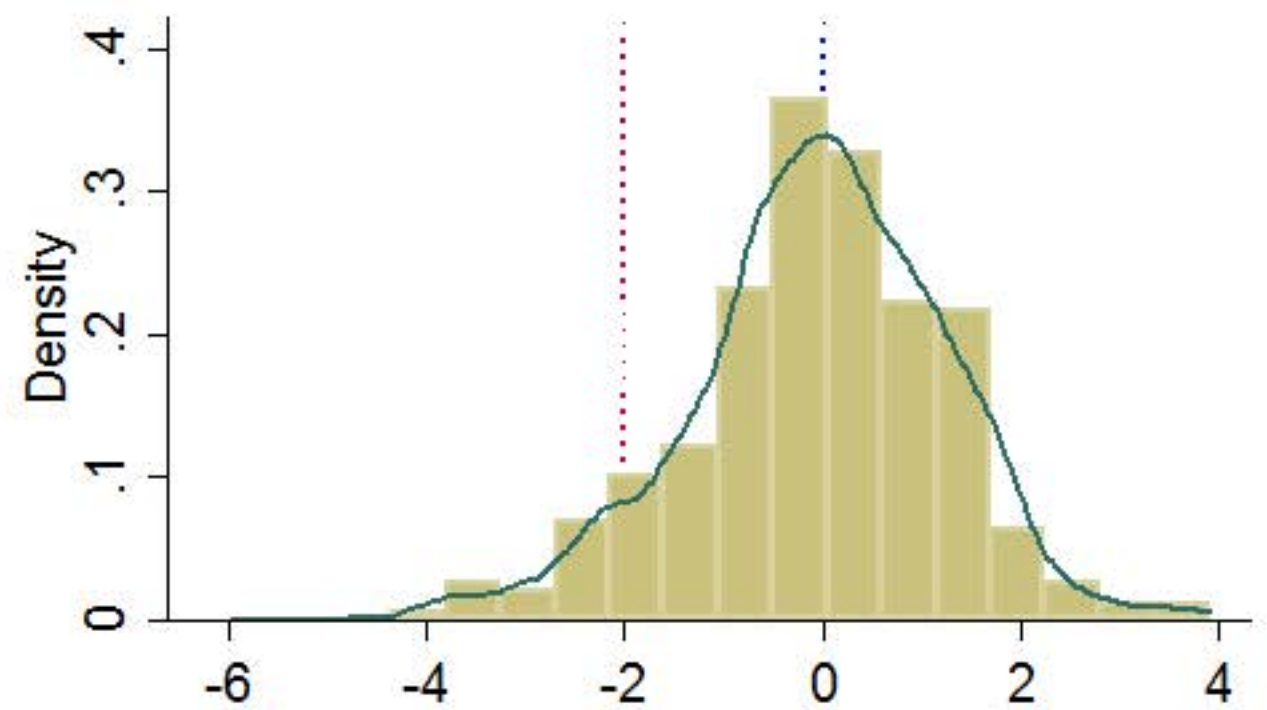

## 2 years

control HAZ

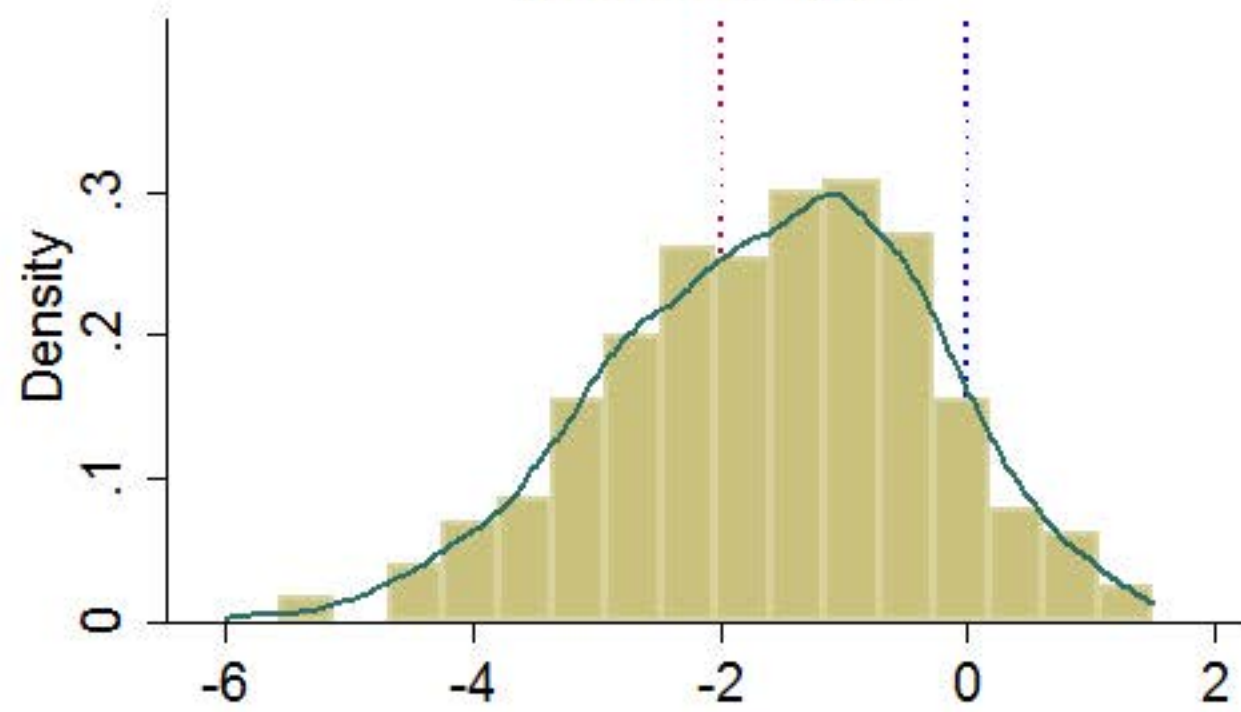

control WLZ

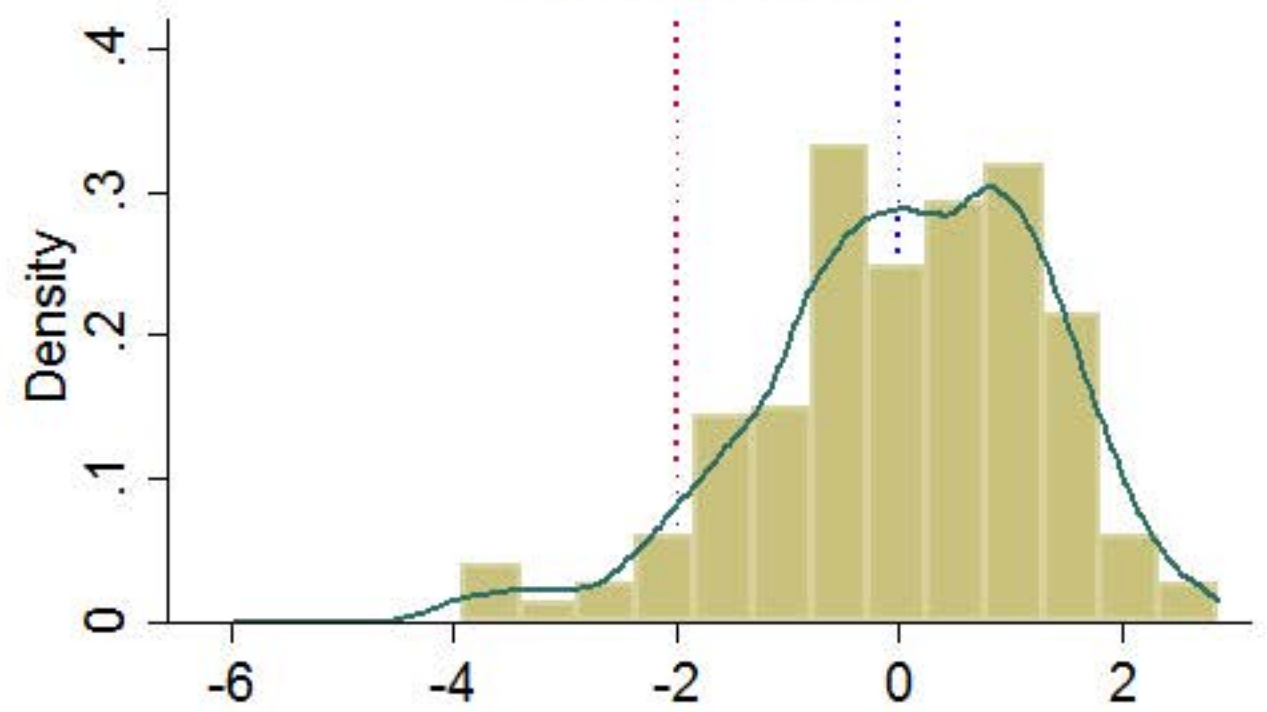

intervention HAZ

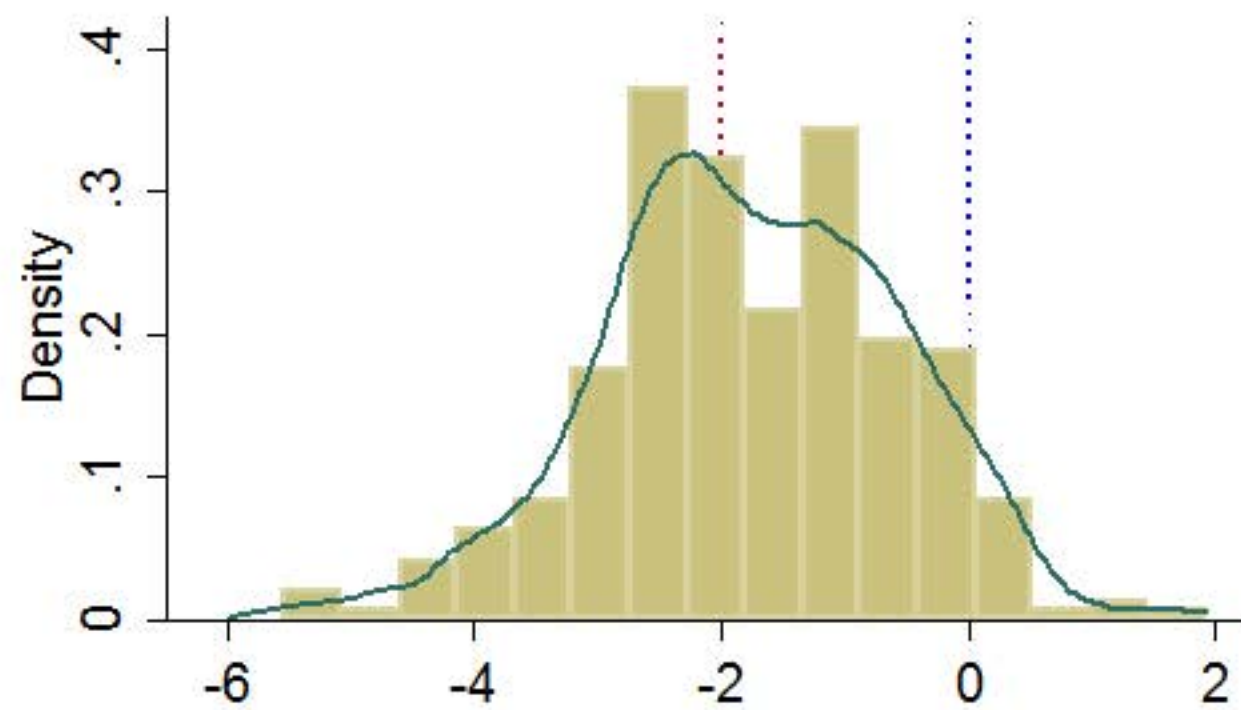

intervention WLZ

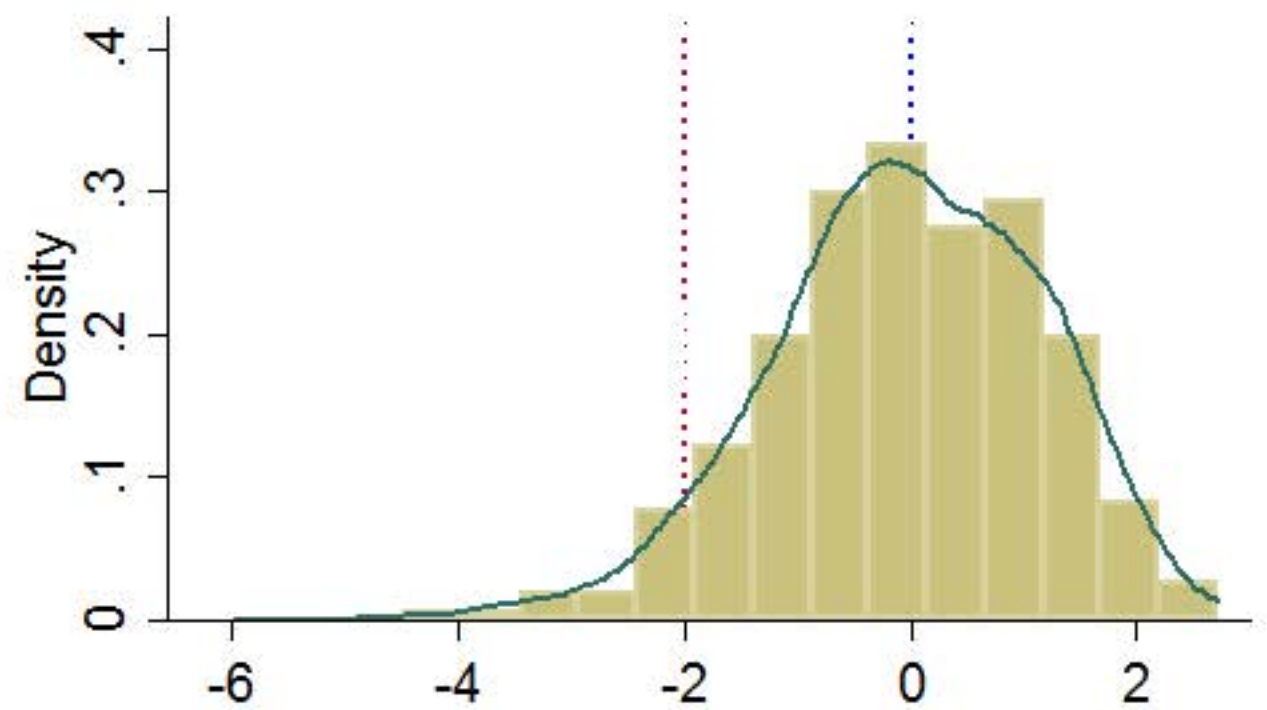

## 5 years

control HAZ

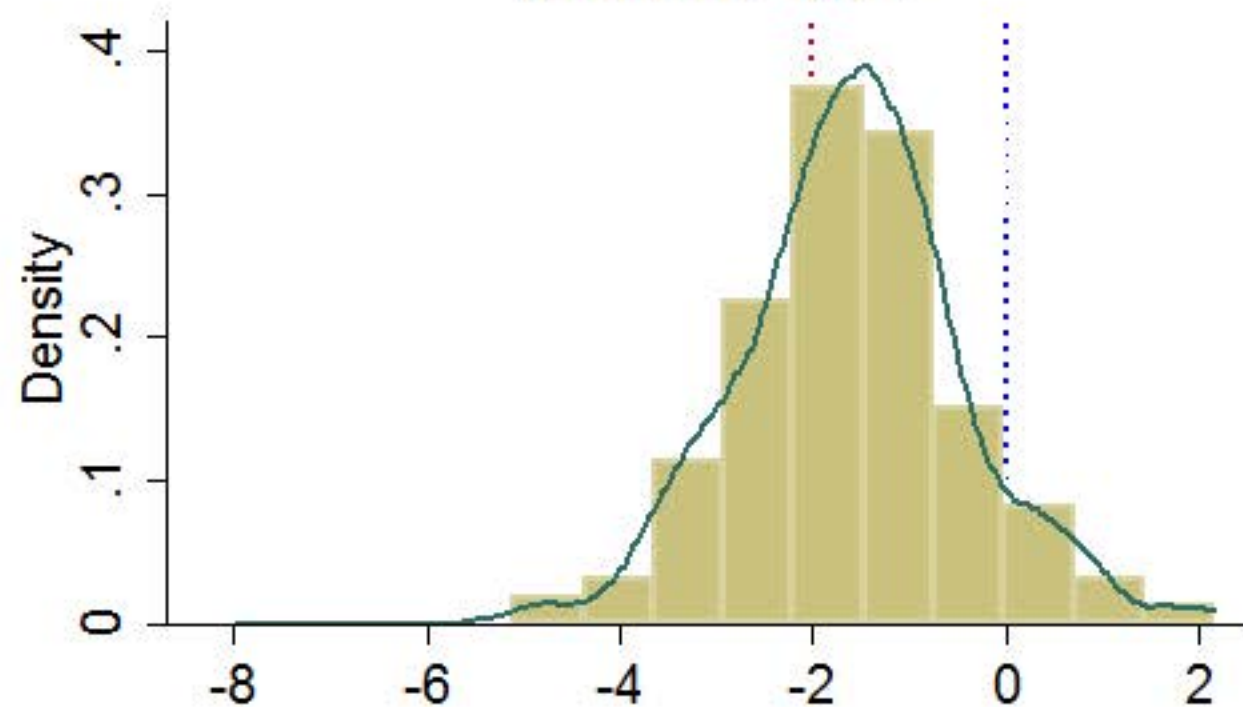

control WAZ

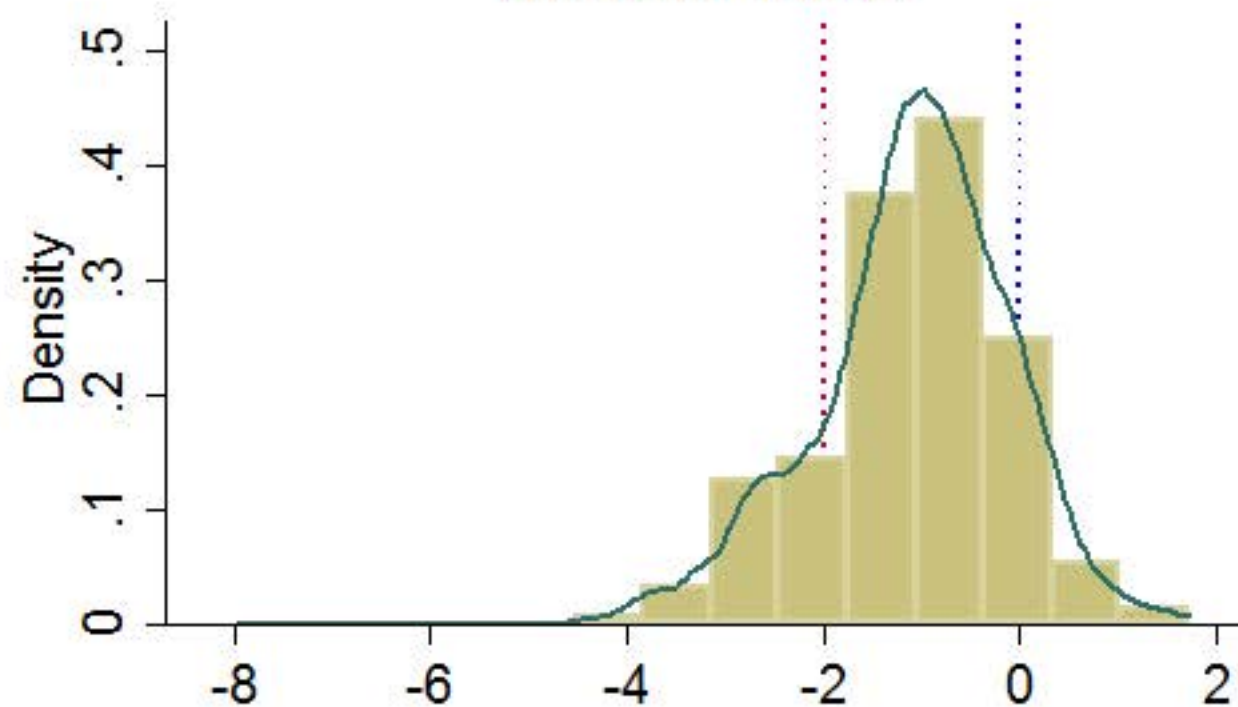

intervention HAZ

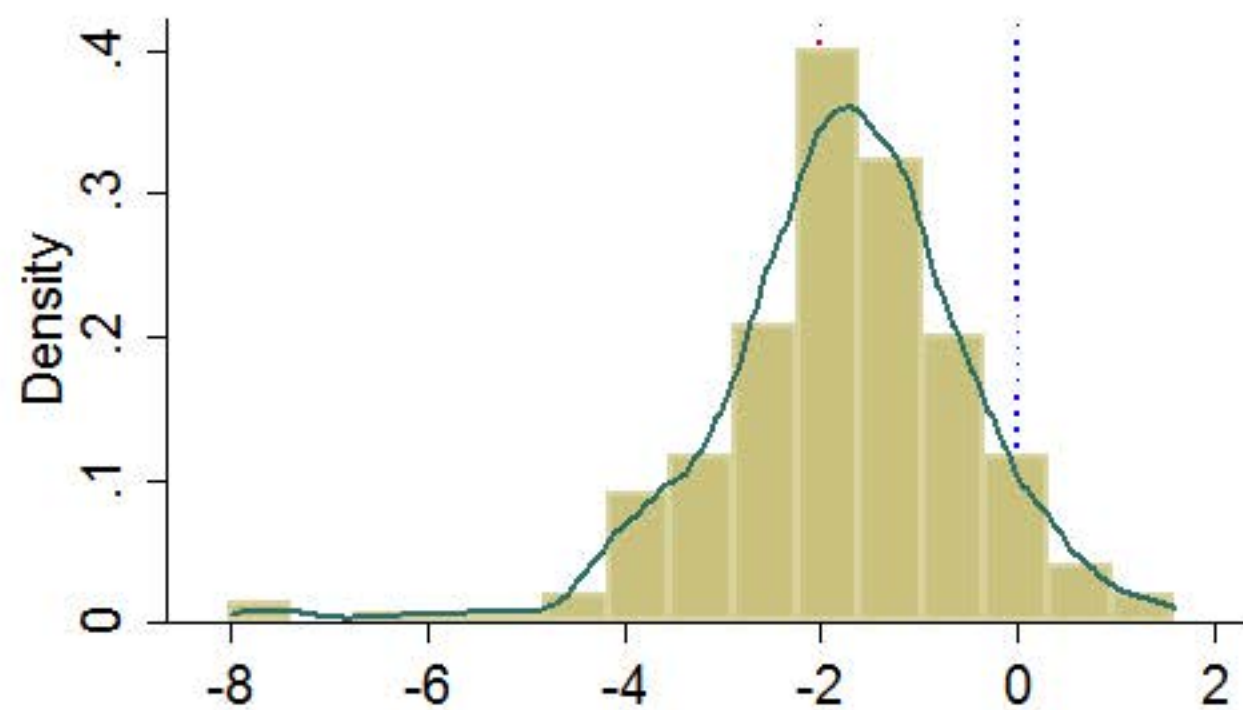

intervention WAZ

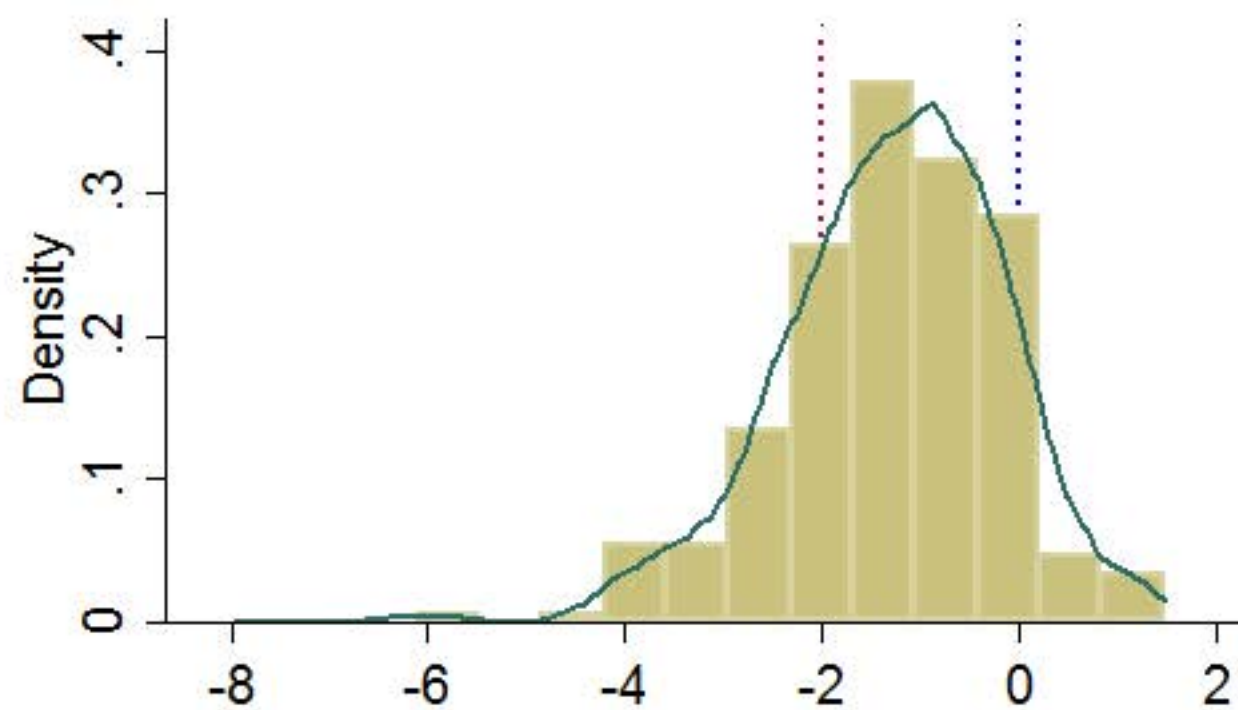

Supplement: 12889_2016_3234_MOESM1_ESM.pdf [file 12889_2016_3234_MOESM1_ESM.pdf]
